# Supplementary material for: Effect of Coronary Artery Disease on COVID-19—Prognosis and Risk Assessment: A Systematic Review and Meta-Analysis
Source: MDPI journal article supplement (doi:10.3390/biology11020221), 2022-01-29
Supplement: s1 [file s1]

# **Effect of Coronary Artery Disease on COVID-19 – Prognosis and Risk Assessment: A systematic review and meta-analysis**

## **Supplementary Material**

### **Content:**

|                                                                                                                     |   |
|---------------------------------------------------------------------------------------------------------------------|---|
| Table S1 Characteristics of included trials. ....                                                                   | 2 |
| Figure S1. A summary table of review authors' judgements for each risk of bias item for each study. ....            | 5 |
| Figure S2. A plot of the distribution of review authors' judgements across studies for each risk of bias item. .... | 6 |

Table S1 Characteristics of included trials.

| Study                       | Country | Study design                       | Study group  | No of patients | Age              | Sex, male     | CAD         |
|-----------------------------|---------|------------------------------------|--------------|----------------|------------------|---------------|-------------|
| Abbasi et al. 2021 [1].     | Iran    | Retrospective cohort study         | Survivor     | 206            | 56 (41–65)       | 172 (65.6%)   | 44 (21.4)   |
|                             |         |                                    | Non-survivor | 56             | 66 (58–77)       | 55 (73.3%)    | 34 (60.7)   |
| Aladag et al. 2020 [2].     | Turkey  | Retrospective cohort study         | Survivor     | 35             | 68(49-75)        | 22 (62.3%)    | 15 (42.9%)  |
|                             |         |                                    | Non-survivor | 15             | 68(60-77)        | 6 (40.0%)     | 7 (46.7%)   |
| Almazeedi et al. 2020 [3].  | Kuwait  | Retrospective cohort study         | Not-ICU      | 1,054          | 37.1(16)         | 856 (96.4%)   | 33 (80.5%)  |
|                             |         |                                    | ICU          | 42             | 54.8(11)         | 32 (3.6%)     | 8 (19.5%)   |
| Barman et al. 2020 [4].     | Turkey  | Multi-center retrospective study   | Survivor     | 504            | 57.5(15.4)       | 273 (54.2%)   | 76 (15.1%)  |
|                             |         |                                    | Non-survivor | 103            | 69.3(12.5)       | 61 (59.2%)    | 40 (38.8%)  |
| Berry et al. 2021 [5]       | USA     | Retrospective cohort study         | Survivor     | 2,410          | 60(48-71)        | 1,434 (59.5%) | 271 (11.2%) |
|                             |         |                                    | Non-survivor | 713            | 76(66-85)        | 451 (63.3%)   | 177 (24.8%) |
| Bruce et al. 2020 [6]       | UK      | Prospectively case report          | Survivor     | 864            | NS               | 484 (70.1%)   | 166 (60.8%) |
|                             |         |                                    | Non-survivor | 358            | NS               | 206 (29.9%)   | 107 (39.2%) |
| Cen et al. 2020 [7]         | China   | Cohort study                       | Non-severe   | 720            | 69 (2)           | 319 (44.3%)   | 31 (4.3%)   |
|                             |         |                                    | Severe       | 287            | 68.6 (2.7)       | 174 (60.6%)   | 34 (11.8%)  |
| Chen et al. 2020 [8]        | China   | Retrospective analysis             | Non-severe   | 109            | 62.4(52.5-70)    | 48 (44.0%)    | 24 (22.0%)  |
|                             |         |                                    | Severe       | 23             | 68.3(63-79)      | 15 (65.2%)    | 7 (30.4%)   |
| Chen et al. 2020 (B) [9]    | China   | Retrospective observational study  | Non-severe   | 675            | 56 (2.7)         | 320 (48.3%)   | 23 (3.4%)   |
|                             |         |                                    | Severe       | 903            | 62.7 (3.3)       | 450 (49.8%)   | 81 (9.0%)   |
| Ciceri et al. 2020 [10]     | Italy   | Retrospective analysis             | Survivor     | 291            | 62(54-72)        | 207 (71.1%)   | 25 (8.6%)   |
|                             |         |                                    | Non-survivor | 95             | 76 (67-82)       | 70 (73.7%)    | 25 (26.3%)  |
| Cipriani et al. 2021 [11]   | Italy   | Single-center, observational study | Survivor     | 89             | 69(57-79)        | 43 (48.3%)    | 9 (10.1%)   |
|                             |         |                                    | Non-survivor | 20             | 86(77-87)        | 10 (50.0%)    | 9 (45.0%)   |
| Conversano et al. 2020 [12] | Italy   | Retrospective, observational study | Survivor     | 149            | 60.4(13.7)       | 100 (67.6%)   | 19 (12.8%)  |
|                             |         |                                    | Non-survivor | 42             | 75.3(12.9)       | 31 (73.8%)    | 9 (21.4%)   |
| Denegri 2021 [13]           | Italy   | Retrospective, observational study | Survivor     | 159            | 65.6(14.1)       | 104 (65.4%)   | 21 (13.3%)  |
|                             |         |                                    | Non-survivor | 42             | 79.7 (10.8)      | 25 (59.5%)    | 14 (33.3%)  |
| Deng 2020 [14]              | China   | Retrospective analysis             | Non-severe   | 45             | 56 (39-67)       | 19 (42.2%)    | 4 (8.9%)    |
|                             |         |                                    | Severe       | 67             | 68 (57-77)       | 38 (56.7%)    | 11 (16.4%)  |
| Deng 2020 (B) [15]          | China   | Retrospective analysis             | Survivor     | 212            | 62.25 (52-70)    | 97 (45.8%)    | 14 (6.6%)   |
|                             |         |                                    | Non-survivor | 52             | 74.5 (65.3-81.8) | 33 (63.5%)    | 18 (34.6%)  |
| Fan 2020 [16]               | China   | Retrospective analysis             | Survivor     | 26             | 46.23 (12.01)    | 17 (65.4%)    | 0 (0%)      |
|                             |         |                                    | Non-survivor | 47             | 65.46 (9.74)     | 32 (68.1%)    | 7 (14.89%)  |
| Forsblom 2021 [17]          | Finland | Retrospective analysis             | Survivor     | 517            | 56 (45-66)       | 269 (52.0%)   | 24 (4.6%)   |
|                             |         |                                    | Non-survivor | 68             | 79 (69-84)       | 47 (69.1%)    | 13 (19.1%)  |
| Giannini 2021 [18]          | Italy   | Retrospective analysis             | Survivor     | 882            | 64 (57-74)       | 584 (66.7%)   | 28 (4.9%)   |
|                             |         |                                    | Non-survivor | 211            | 77 (70-82)       | 158 (74.9%)   | 15 (16.9%)  |
| Gu 2020 [19]                | China   | Retrospective analysis             | Survivor     | 181            | 62.4 (14.7)      | 117 (64.6%)   | 15 (8.3%)   |
|                             |         |                                    | Non-survivor | 94             | 70.7 (13.3)      | 56 (59.6%)    | 25 (26.6%)  |
| Guan 2020 [20]              | China   | Retrospective analysis             | Non-severe   | 926            | 45.0 (34.0–57.0) | 537 (58.0%)   | 17 (1.8%)   |
|                             |         |                                    | Severe       | 173            | 52.0 (40.0–65.0) | 100 (57.8%)   | 10 (5.8%)   |
|                             | India   |                                    | Not-ICU      | 168            | 37.93±16.44      | 96 (57.1%)    | 6(3.57%)    |

|                     |            |                                    |              |       |               |              |             |
|---------------------|------------|------------------------------------|--------------|-------|---------------|--------------|-------------|
| Gupta 2020 [21]     |            | prospective observational analysis | ICU          | 32    | 51.06±16.03   | 20 (62.4%)   | 3(9.38%)    |
| Gupta 2021 [22]     | USA        | Retrospective analysis             | Survivor     | 121   | 68 [58, 80]   | 66 (54.5%)   | 14 (11.6%)  |
|                     |            |                                    | Non-survivor | 59    | 71 [61, 83]   | 32 (54.2%)   | 11 (18.6%)  |
| Hewitt 2020 [23]    | UK         | observational cohort study         | Survivor     | 1,139 | NS            | 648 (71.8%)  | 213 (61.7%) |
|                     |            |                                    | Non-survivor | 425   | NS            | 255 (28.2%)  | 132 (38.3%) |
| Huang 2020 [24]     | China      | Retrospective analysis             | Survivor     | 283   | 52.5 ± 16.6   | 149 (52.7%)  | 11 (3.9%)   |
|                     |            |                                    | Non-survivor | 16    | 69.2 ± 9.7    | 11 (68.8%)   | 2 (12.5%)   |
| Iaccarino 2020 [25] | Italy      | Observational Study                | Survivor     | 1,403 | 64.7±0.4      | 892 (63.6%)  | 160 (11.4%) |
|                     |            |                                    | Non-survivor | 188   | 79.6±0.8      | 125 (66.5%)  | 56 (29.8%)  |
| Islam 2020 [26]     | Bangladesh | Retrospective analysis             | Survivor     | 991   | NS            | 632 (63.8%)  | 4 (16.0%)   |
|                     |            |                                    | Non-survivor | 25    | NS            | 19 (76.0%)   | 36 (3.6%)   |
| Kuno 2020 [27]      | USA        | Retrospective analysis             | Survivor     | 7,185 | NS            | NS           | 505 (7.0%)  |
|                     |            |                                    | Non-survivor | 723   | NS            | NS           | 218 (30.2%) |
| Lagi 2020 [28]      | Italy      | Retrospective analysis             | Not-ICU      | 68    | 62 (50-72)    | 41 (60.3%)   | 7 (10.3%)   |
|                     |            |                                    | ICU          | 16    | 67 (58-71)    | 14 (87.5%)   | 5 (31.3%)   |
| Lee 2020 [29]       | Korea      | Retrospective analysis             | Non-severe   | 557   | 52.10 (18.29) | 155 (27.8%)  | 11 (2.9%)   |
|                     |            |                                    | Severe       | 137   | 71.41 (13.17) | 57 (41.6%)   | 6 (5.9%)    |
| Lendorf 2020 [30]   | Denamrk    | Retrospective analysis             | Not-ICU      | 91    | 69 (57-79)    | 50 (54.9%)   | 16 (17.6%)  |
|                     |            |                                    | ICU          | 20    | 64 (53.72)    | 17 (85.0%)   | 3 (15.0%)   |
| Levy 2020 [31]      | USA        | Retrospective analysis             | Survivor     | 4,048 | NS            | 2321 (57.3%) | 270 (7.1%)  |
|                     |            |                                    | Non-survivor | 1,185 | NS            | 736 (62.1%)  | 184 (16.5%) |
| Li 2020 [32]        | China      | Retrospective analysis             | Non-severe   | 16    | NS            | 6 (37.5%)    | 3 (18.8%)   |
|                     |            |                                    | Severe       | 9     | NS            | 6 (66.7%)    | 1 (11.1%)   |
|                     |            |                                    | Survivor     | 20    | NS            | 8 (40.0%)    | 3 (15.0%)   |
|                     |            |                                    | Non-survivor | 5     | NS            | 4 (80.0%)    | 1 (20.0%)   |
| Li 2020 (B) [33]    | China      | Retrospective analysis             | Survivor     | 60    | 62 (53-70)    | 33 (55.0%)   | 2 (3.3%)    |
|                     |            |                                    | Non-survivor | 14    | 71 (69-77)    | 11 (78.6%)   | 4 (28.6%)   |
| Liu 2020 [34]       | China      | Retrospective analysis             | Non-severe   | 1,087 | 57.75 (3.5)   | 475 (43.7%)  | 79 (7.3%)   |
|                     |            |                                    | Severe       | 957   | 64.9 (3.8)    | 525 (54.9%)  | 120 (12.5%) |
| Liu 2020 (B) [35]   | China      | Retrospective analysis             | Non-severe   | 61    | 51(20-83)     | 31 (50.8)    | 2 (3.3%)    |
|                     |            |                                    | Severe       | 23    | 67(31-91)     | 16 (69.6%)   | 6 (26.1%)   |
| Loffi 2020 [36]     | Italy      | Retrospective analysis             | Survivor     | 1,000 | NS            | NS           | 69 (6.0%)   |
|                     |            |                                    | Non-survivor | 252   | NS            | NS           | 55 (21.9%)  |
| Maeda 2020 [37]     | USA        | Retrospective analysis             | Not-ICU      | 167   | 65 [51, 77]   | 96 (57.5%)   | 27 (16.2%)  |
|                     |            |                                    | ICU          | 57    | 67 [58, 76]   | 31 (54.4%)   | 18 (31.6%)  |
| Mousseaux 2021 [38] | France     | prospective observational cohort   | Non-severe   | 42    | 69.3 (12.5)   | 24 (57.1%)   | 0 (0.0%)    |
|                     |            |                                    | Severe       | 63    | 76.1 (11.3)   | 50 (79.4%)   | 1 (2.4%)    |
| Patel 2021 [39]     | USA        | Retrospective analysis             | Survivor     | 696   | 61 (47–73)    | 384 (55.2%)  | 131 (18.8%) |
|                     |            |                                    | Non-survivor | 106   | 73 (61–84)    | 67 (63.2%)   | 31 (29.2%)  |
| Peterson 2021 [40]  | USA        | Retrospective analysis             | Survivor     | 275   | NS            | NS           | 53 (19.3%)  |
|                     |            |                                    | Non-survivor | 80    | NS            | NS           | 24 (30.0%)  |
| Qin 2021 [41]       | China      | Retrospective analysis             | Survivor     | 239   | 63 (52–69)    | 113 (47.3%)  | 22 (9.2%)   |
|                     |            |                                    | Non-survivor | 23    | 69 (65–74)    | 10 (43.5%)   | 4 (17.4%)   |
|                     | Italy      |                                    | Survivor     | 157   | 65.6 (15.6)   | 95 (60.5%)   | 16 (10.2%)  |

|                    |             |                        |              |       |                  |              |             |
|--------------------|-------------|------------------------|--------------|-------|------------------|--------------|-------------|
| Russo 2020 [42]    |             | Retrospective analysis | Non-survivor | 35    | 77.0 (8.3)       | 20 (57.1%)   | 10 (28.6%)  |
| Scoccia 2021 [43]  | Italy       | Retrospective analysis | Survivor     | 1,239 | NS               | NS           | 792 (58.8%) |
|                    |             |                        | Non-survivor | 386   | NS               | NS           | 329 (85.2%) |
| Serin 2020 [44]    | Turkey      | Retrospective analysis | Survivor     | 2,149 | NS               | NS           | 147 (6.8%)  |
|                    |             |                        | Non-survivor | 68    | NS               | NS           | 18 (26.5%)  |
| Shang 2020 [45]    | China       | Retrospective analysis | Survivor     | 64    | 62 (53-71)       | 37 (57.8%)   | 8 (12.5%)   |
|                    |             |                        | Non-survivor | 49    | 73 (64.5-79)     | 36 (73.5%)   | 20 (40.8%)  |
| Shi 2020 [46]      | China       | Retrospective analysis | Survivor     | 609   | 61 (49-70)       | 287 (47.1%)  | 39 (6.4%)   |
|                    |             |                        | Non-survivor | 62    | 74 (66-81)       | 35 (56.5%)   | 21 (33.9%)  |
| Singh 2021 [47]    | Netherlands | Retrospective analysis | Non-severe   | 418   | 67.19±15.34      | 214 (51.19%) | 49 (19.76%) |
|                    |             |                        | Severe       | 1,166 | 69.3 (12.8)      | 723 (62.0%)  | 112 (9.6%)  |
|                    |             |                        | Survivor     | 1,209 | 66.2 (13.7)      | 686 (56.7%)  | 105 (8.7%)  |
|                    |             |                        | Non-survivor | 375   | 77.10±8.61       | 251 (67.43)  | 56 (21.70%) |
| Slipczuk 2021 [48] | USA         | Retrospective analysis | Survivor     | 296   | 72 (64-80)       | 96 (48.7%)   | 131 (44.3%) |
|                    |             |                        | Non-survivor | 197   | 68 (57-76)       | 148 (50.0%)  | 108 (54.8%) |
| Sun 2020 [49]      | China       | Retrospective analysis | Survivor     | 123   | 67 (64-72)       | 51 (41.5%)   | 15 (12.2%)  |
|                    |             |                        | Non-survivor | 121   | 72 (66-78)       | 82 (67.8%)   | 20 (16.7%)  |
| Sun 2020 (B) [50]  | China       | Retrospective analysis | Non-severe   | 310   | 48 (35-62)       | 157 (50.6%)  | 12 (3.9%)   |
|                    |             |                        | Severe       | 26    | 65 (63-75)       | 20 (76.9%)   | 5 (19.2%)   |
| Terlecki 2021 [51] | Poland      | Retrospective analysis | Survivor     | 1,506 | 61.0 (49-72)     | 757 (50.3%)  | 223 (14.8%) |
|                    |             |                        | Non-survivor | 223   | 78 (69-84)       | 129 (57.8%)  | 67 (30.0%)  |
| Turagam 2020 [52]  | USA         | Retrospective analysis | Survivor     | 88    | 58 (45-71)       | 64 (73%)     | 22 (25%)    |
|                    |             |                        | Non-survivor | 52    | 71 (58-78)       | 38 (73%)     | 13 (25%)    |
| Wang 2020 [53]     | China       | Retrospective analysis | Survivor     | 277   | 46.0 (14.4)      | 129 (46.6%)  | 5 (1.8%)    |
|                    |             |                        | Non-survivor | 19    | 65.6 (12.6)      | 11 (57.9%)   | 5 (26.3%)   |
| Wei 2020 [54]      | China       | Retrospective analysis | Non-severe   | 262   | 50.0 (39.0-57.0) | NS           | 8 (5.2%)    |
|                    |             |                        | Severe       | 14    | 65.0 (60.0-72.8) | NS           | 4 (28.6%)   |
| Xie 2020 [55]      | China       | Retrospective analysis | Non-severe   | 38    | 60.1 (7.5)       | 14 (36.8%)   | 1 (2.6%)    |
|                    |             |                        | Severe       | 24    | 71.2 (6.6)       | 13 (54.2%)   | 6 (25.0%)   |
| Xiong 2020 [56]    | China       | Retrospective analysis | Non-severe   | 61    | 56.0 (37.0-64.0) | 42 (68.9%)   | 4 (6.6%)    |
|                    |             |                        | Severe       | 55    | 64.0 (53.0-76.0) | 38 (69.1%)   | 13 (23.6%)  |
| Xu 2020 [57]       | China       | Retrospective analysis | Non-severe   | 47    | 52.49 (14.62)    | 21 (44.68%)  | 3 (17.65%)  |
|                    |             |                        | Severe       | 41    | 63.2 (14.5)      | 20 (48.8%)   | 4 (9.8%)    |
| Yuan 2020 [58]     | China       | Retrospective analysis | Non-severe   | 61    | 66 (52, 69)      | 30 (49.2%)   | 4 (6.6%)    |
|                    |             |                        | Severe       | 46    | 68 (61, 76)      | 21 (45.7%)   | 5 (10.9%)   |
| Zhang 2020 [59]    | China       | Retrospective analysis | Non-severe   | 182   | 49.26 (16.13)    | 75 (41.2%)   | 5 (2.7%)    |
|                    |             |                        | Severe       | 359   | 61.9 (15.4)      | 180 (50.1%)  | 36 (10.0%)  |
| Zhao 2020 [60]     | China       | Retrospective analysis | Non-severe   | 414   | 54 (37-65)       | 71 (56.8%)   | 17 (4.1%)   |
|                    |             |                        | Severe       | 125   | 70 (61.5-80)     | 184 (44.4%)  | 20 (16.0%)  |
| Zhou 2020 [61]     | China       | Retrospective analysis | Survivor     | 137   | 52 (45-58)       | 81 (59.1%)   | 2 (1.5%)    |
|                    |             |                        | Non-survivor | 54    | 69 (63-76)       | 38 (70.4%)   | 13 (24.1%)  |
| Zou 2020 [62]      | China       | Retrospective analysis | Survivor     | 102   | 56.45 ± 12.64    | 47 (46.08%)  | 5 (4.90%)   |
|                    |             |                        | Non-survivor | 52    | 68.98 ± 9.22     | 20 (38.46%)  | 18 (34.62%) |

|                 | Risk of bias domains |    |    |    |    |    |    |         |
|-----------------|----------------------|----|----|----|----|----|----|---------|
|                 | D1                   | D2 | D3 | D4 | D5 | D6 | D7 | Overall |
| Abbasi 2021     | +                    | -  | +  | +  | +  | +  | +  | +       |
| Aladag 2020     | +                    | +  | +  | -  | +  | +  | +  | -       |
| Almazeedi 2020  | +                    | +  | +  | -  | +  | +  | +  | +       |
| Barman 2020     | +                    | -  | +  | +  | +  | +  | -  | +       |
| Berry 2021      | +                    | -  | +  | +  | -  | +  | +  | +       |
| Bruce 2020      | +                    | +  | -  | -  | +  | +  | +  | +       |
| Cen 2020        | +                    | +  | +  | -  | +  | +  | -  | -       |
| Chen 2020       | +                    | -  | +  | +  | +  | +  | -  | -       |
| Chen 2020 (B)   | +                    | +  | +  | -  | +  | +  | -  | -       |
| Ciceri 2020     | +                    | +  | +  | -  | -  | +  | -  | +       |
| Cipriani 2021   | +                    | +  | +  | +  | +  | +  | +  | -       |
| Conversano 2020 | +                    | +  | +  | -  | +  | +  | -  | +       |
| Denegri 2021    | +                    | +  | +  | -  | +  | +  | -  | +       |
| Deng 2020       | +                    | +  | -  | +  | +  | +  | +  | +       |
| Deng 2020 (B)   | +                    | -  | +  | -  | -  | +  | +  | +       |
| Fan 2020        | +                    | +  | +  | +  | +  | +  | +  | +       |
| Forsblom 2021   | +                    | +  | +  | +  | +  | +  | +  | +       |
| Giannini 2021   | -                    | +  | +  | +  | +  | +  | -  | +       |
| Gu 2020         | +                    | +  | -  | +  | +  | +  | -  | +       |
| Guan 2020       | +                    | +  | +  | +  | +  | -  | +  | +       |
| Gupta 2020      | +                    | +  | +  | -  | +  | +  | -  | +       |
| Gupta 2021      | -                    | +  | +  | -  | -  | +  | +  | +       |
| Hewitt 2020     | +                    | +  | -  | -  | +  | -  | +  | +       |
| Huang 2020      | +                    | +  | +  | -  | +  | +  | -  | +       |
| Iccarino 2020   | +                    | +  | +  | -  | -  | +  | +  | -       |
| Islam 2020      | +                    | +  | +  | +  | +  | +  | +  | -       |
| Kuno 2020       | +                    | +  | +  | +  | +  | -  | -  | -       |
| Lagi 2020       | +                    | +  | +  | +  | -  | +  | +  | -       |
| Lee 2020        | +                    | +  | -  | +  | +  | +  | +  | +       |
| Lendorf 2020    | +                    | -  | +  | +  | +  | +  | -  | -       |
| Levy 2020       | +                    | -  | +  | +  | +  | +  | +  | -       |
| Li 2020         | +                    | +  | +  | +  | +  | +  | -  | -       |
| Li 2020 (B)     | +                    | +  | +  | +  | +  | -  | -  | -       |
| Liu 2020        | -                    | +  | -  | -  | -  | -  | +  | -       |
| Liu 2020 (B)    | +                    | -  | +  | +  | -  | +  | +  | +       |
| Loffi 2020      | +                    | -  | +  | +  | -  | +  | +  | +       |
| Maeda 2020      | -                    | +  | -  | -  | -  | -  | -  | -       |
| Mousseaux 2021  | +                    | +  | +  | +  | +  | +  | +  | +       |
| Patel 2021      | +                    | +  | -  | +  | +  | +  | +  | +       |
| Peterson 2021   | +                    | -  | +  | -  | -  | -  | -  | +       |
| Qin 2021        | +                    | -  | -  | -  | -  | +  | -  | -       |
| Russo 2020      | +                    | -  | +  | +  | +  | -  | +  | +       |
| Scoccia 2020    | +                    | +  | +  | +  | +  | -  | +  | +       |
| Serin 2020      | +                    | +  | +  | -  | -  | +  | +  | +       |
| Shang 2020      | +                    | -  | +  | -  | -  | +  | +  | +       |
| Shi 2020        | -                    | -  | +  | +  | -  | -  | +  | -       |
| Singh 2020      | +                    | +  | +  | +  | +  | +  | +  | +       |
| Slipczuk 2021   | +                    | +  | -  | -  | +  | -  | +  | +       |
| Sun 2020        | +                    | +  | +  | -  | +  | -  | -  | +       |
| Sun 2020 (B)    | +                    | +  | +  | +  | +  | -  | +  | +       |
| Terlecki 2020   | -                    | +  | +  | -  | +  | -  | -  | -       |
| Turagam 2020    | -                    | -  | +  | -  | -  | -  | +  | -       |
| Wang 2020       | +                    | +  | +  | +  | -  | -  | -  | -       |
| Wei 2020        | +                    | +  | +  | -  | +  | -  | -  | +       |
| Xie 2020        | -                    | -  | +  | -  | -  | -  | +  | +       |
| Xiong 2020      | +                    | -  | -  | -  | +  | -  | -  | +       |
| Xu 2020         | -                    | -  | +  | -  | -  | +  | +  | +       |
| Yuan 2018       | -                    | -  | +  | -  | +  | -  | +  | +       |
| Zhang 2020      | +                    | -  | +  | +  | -  | -  | -  | -       |
| Zhao 2020       | -                    | -  | +  | +  | -  | -  | -  | -       |
| Zhou 2020       | +                    | +  | +  | +  | +  | +  | +  | +       |
| Zou 2020        | +                    | -  | -  | +  | +  | +  | +  | +       |

Domains:  
D1: Bias due to confounding.  
D2: Bias due to selection of participants.  
D3: Bias in classification of interventions.  
D4: Bias due to deviations from intended interventions.  
D5: Bias due to missing data.  
D6: Bias in measurement of outcomes.  
D7: Bias in selection of the reported result.

Judgement  
+ Serious  
- Moderate  
+ Low

Figure S1. A summary table of review authors' judgements for each risk of bias item for each study.

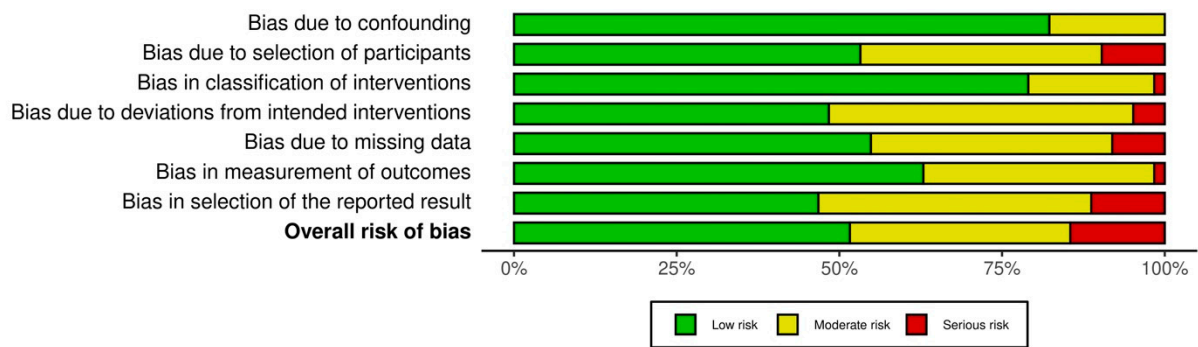

Figure S2. A plot of the distribution of review authors' judgements across studies for each risk of bias item.
